# Supplementary material for: Dysphagia Management and Cervical Auscultation: Reliability and Validity Against FEES
Source: Springer Nature journal article supplement (doi:10.1007/s00455-022-10468-8), 2022-07-15
Supplement: MOESM1 [file 23272242]

**Title:** Dysphagia management and cervical auscultation: Reliability and validity against FEES

**Journal name:** Dysphagia

**Online resource 1.** Patient characteristics

| Diagnosis and medical history                                                                                                                         | Patient age | Patient admission | FEES             |                                                                                   |
|-------------------------------------------------------------------------------------------------------------------------------------------------------|-------------|-------------------|------------------|-----------------------------------------------------------------------------------|
|                                                                                                                                                       |             |                   | Dysphagia rating | PAS score                                                                         |
| Amyotrophic Lateral Sclerosis (ALS)                                                                                                                   | 56          | Outpatient        | 3                | IDDSI-0 (5 ml)=PAS 1<br>IDDSI-0 (10 ml)=PAS 2<br>IDDSI-2=PAS 1<br>IDDSI-4=PAS 2   |
| Chronic renal failure (Stage 5), dialysis 3/week, ischemic heart disease, previous myocardial infarction. Repeated aspiration pneumonias              | 80          | Outpatient        | 2-3              | IDDSI-0 (5 ml)=PAS 1<br>IDDSI-0 (10 ml)=PAS 2<br>IDDSI-2=PAS 1<br>IDDSI-4=PAS 1   |
| Chronic dysphagia, diagnosed with Schatzki's ring, treated with dilatation.                                                                           | 80          | Outpatient        | 3-4              | IDDSI-0 (5 ml)=PAS 2<br>IDDSI-0 (10 ml)=PAS 3<br>IDDSI-2=PAS 1<br>IDDSI-4=PAS 2   |
| Admitted with increased work of breathing, cardiac arrhythmia, constipation and dehydration. Previous pons stroke, back pain, ALS and Graves' disease | 71          | Inpatient         | 4                | IDDSI-0 (5 ml)=PAS 1<br>IDDSI-0 (10 ml)=PAS 1<br>IDDSI-2 =PAS 1<br>IDDSI-4 =PAS 1 |
| Myasthenia Gravis. Patient describes worsening breathing, non-invasive ventilation (BiPAP) overnight, cough assist.                                   | 68          | Outpatient        | 3                | IDDSI-0 (5 ml)=PAS 5<br>IDDSI-2=PAS 5<br>IDDSI-4=PAS 5                            |

|                                                                                                                                                                                   |    |            |     |                                                                                   |
|-----------------------------------------------------------------------------------------------------------------------------------------------------------------------------------|----|------------|-----|-----------------------------------------------------------------------------------|
| Dysphagia follow-up after parapharyngeal abscess and tracheostomy. Decannulated at time of assessment.                                                                            | 82 | Outpatient | 3   | IDDSI-0 (5ml)=PAS<br>IDDSI-0 (10ml)=PAS<br>IDDSI-2=PAS<br>IDDSI-4=PAS             |
| Huntington's disease                                                                                                                                                              | 55 | Outpatient | 2   | IDDSI-0 (5 ml)=PAS 7<br>IDDSI-0 (10 ml)=PAS 7<br>IDDSI-2=PAS 5<br>IDDSI-4=PAS 7-8 |
| Nine-year history of dysphagia following acute aorta aneurysm operation, vocal fold paresis, cricopharyngeal dysfunction. History of prostate cancer, anaemia and kidney failure. | 78 | Outpatient | 2-3 | IDDSI-0 (5 ml)=PAS 7<br>IDDSI-0 (10 ml)=PAS X<br>IDDSI-2=PAS 7<br>IDDSI-4=PAS 4   |
| Globus sensation. History of ulcerative colitis.                                                                                                                                  | 43 | Outpatient | 5   | IDDSI-0 (5 ml)=PAS 1<br>IDDSI-0 (10 ml)=PAS 1<br>IDDSI-2=PAS 1<br>IDDSI-4=PAS 1   |
| Huntington's disease                                                                                                                                                              | 65 | Outpatient | 3   | IDDSI-0 (5 ml)=PAS 1<br>IDDSI-2=PAS 1<br>IDDSI-4=PAS 1                            |
| Self-reported swallowing difficulties past months, with food getting stuck in the throat. Barium swallow = normal. History of diabetes.                                           | 53 | Outpatient | 5   | IDDSI-0 (5 ml)=PAS 1<br>IDDSI-0 (10 ml)=PAS 1<br>IDDSI-2=PAS 1<br>IDDSI-4=PAS 1   |

|                                                                                                                                                                                                           |    |            |   |                                                                                   |
|-----------------------------------------------------------------------------------------------------------------------------------------------------------------------------------------------------------|----|------------|---|-----------------------------------------------------------------------------------|
| Self-reported swallowing difficulties. Globus sensation and vocal fold paresis.                                                                                                                           | 83 | Outpatient | 5 | IDDSI-0 (5 ml)=PAS 1<br>IDDSI-0 (10 ml)=PAS 1<br>IDDSI-2=PAS 1<br>IDDSI-4=PAS 1   |
| Parkinsons Disease (PD) with increasing dysphagia past 3 months. History of cardiac infarct, diabetes myelitis type II.                                                                                   | 71 | Outpatient | 4 | IDDSI-0 (5 ml)=PAS 1<br>IDDSI-0 (10 ml)=PAS 1<br>IDDSI-2=PAS 1<br>IDDSI-4=PAS 1   |
| Multiple sclerosis, Barrett's oesophagus, recurrent aspiration related pneumonia                                                                                                                          | 69 | Outpatient | 4 | IDDSI-0=PAS 1<br>IDDSI-2=PAS 1<br>IDDSI-4=PAS 1                                   |
| Rheumatoid arthritis. Idiopathic dysphagia and voice disorder for over a year.                                                                                                                            | 60 | Outpatient | 2 | IDDSI-0 (5 ml)=PAS 8<br>IDDSI-0 (10 ml)=PAS 8<br>IDDSI-2=PAS 2<br>IDDSI-4=PAS 1   |
| Admitted with acute exacerbation of chronic obstructive pulmonary disease. History of atrial fibrillation, ischemic heart disease, Barrett's oesophagus, kidney disease. Several pnuemonias recent years. | 71 | Inpatient  | 3 | IDDSI-0 (5 ml)=PAS 7<br>IDDSI-0 (10 ml)=PAS 8<br>IDDSI-2 =PAS 1<br>IDDSI-4 =PAS 1 |
| Self-reported swallowing difficulties<br>History of transient ischaemic attack, mild reflux.                                                                                                              | 73 | Outpatient | 5 | IDDSI-0 (5 ml)=PAS 1<br>IDDSI-0 (10 ml) =PAS 1<br>IDDSI-2=PAS 1<br>IDDSI-4=PAS 1  |

|                                                                                               |    |            |   |                                                                                 |
|-----------------------------------------------------------------------------------------------|----|------------|---|---------------------------------------------------------------------------------|
| Self-reported swallow difficulties and globus sensation. Previous investigations = normal.    | 52 | Outpatient | 5 | IDDSI-0 (5 ml)=PAS 1<br>IDDSI-0 (10 ml)=PAS 1<br>IDDSI-2=PAS 1<br>IDDSI-4=PAS 1 |
| Self-reported swallowing difficulties<br>History of cardiac infarct, COPD/asthma, smoker.     | 72 | Outpatient | 5 | IDDSI-0 (5 ml)=PAS 1<br>IDDSI-0 (10 ml)=PAS 1<br>IDDSI-2=PAS 1<br>IDDSI-4=PAS 1 |
| Multiple system atrophy.<br>History of dysphagia symptoms for over 1 year.                    | 72 | Outpatient | 4 | IDDSI-0 (5 ml)=PAS 1<br>IDDSI-0 (10 ml)=PAS 1<br>IDDSI-2=PAS 1<br>IDDSI-4=PAS 1 |
| Parkinson's disease, cognitive decline and weight loss.                                       | 82 | Outpatient | 2 | IDDSI-0 (5 ml)=PAS 4<br>IDDSI-0 (10 ml)=PAS 5<br>IDDSI-2=PAS 3<br>IDDSI-4=PAS 3 |
| Malignant tumour of the neck, radiotherapy completed 3 months prior. Nasogastric tube insitu. | 70 | Outpatient | 2 | IDDSI-0 (5 ml)=PAS 5<br>IDDSI-0 (10 ml)=PAS 5<br>IDDSI-2=PAS 1<br>IDDSI-4=PAS 1 |
| Current investigations for suspected Parkinson's plus disease.                                | 66 | Outpatient | 4 | IDDSI-0 (5 ml)=PAS 1<br>IDDSI-0 (10 ml)=PAS 1<br>IDDSI-2=PAS 1<br>IDDSI-4=PAS 1 |

---

Penetration Aspiration Scale (PAS)

Dysphagia ratings adapted from Skeat & Perry. Dysphagia. 2005;20:89-174. doi: 10.1007/s00455-004-0028-z.
