# Supplementary material for: Dysphagia Management and Cervical Auscultation: Reliability and Validity Against FEES
Source: Springer Nature journal article supplement (doi:10.1007/s00455-022-10468-8), 2022-07-15
Supplement: MOESM2 [file 23272242]

**Title:** Dysphagia management and cervical auscultation: Reliability and validity against FEES

**Journal name:** Dysphagia

**Online Resource 2. FEES protocol (Part 2, Assessment of swallowing)**

---

**Thin liquids (IDDSI-0)**

5ml x 2 (via teaspoon)

10ml x 2 (via spoon)

Mouthful x 1 (patient determined mouthful size, via dysphagia ‘nosey’ cup)

20ml (via several mouthfuls)

**Mildly thick liquids (IDDSI-2): Ekströms “nyponsoppa”**

5ml x 2 (via teaspoon)

10ml x 2 (via spoon)

(if safe)

10ml x 3 (via spoon)

**Extremely thick liquids (IDDSI-4) Ekströms apricot “kräm”**

5ml x 2 (via teaspoon)

10ml x 2 (via spoon)

(if safe)

10ml x 3 (via spoon)

**Soft biscuit (IDDSI-7)**

¼ Göteborg’s “Marie” biscuit, dunked in nyponssoppa

**Thin liquids (IDDSI-0)**

10ml x 2 (via spoon)

and/or mouthful (via dysphagia cup)
