# Supplementary material for: Dysphagia Management and Cervical Auscultation: Reliability and Validity Against FEES
Source: Springer Nature journal article supplement (doi:10.1007/s00455-022-10468-8), 2022-07-15
Supplement: MOESM3 [file 23272242]

**Online Resource 3.** Summary of swallow-respiratory sound interpretation

| Characteristics | Respiration at rest, pre-swallow                                                                                                                                                       | Swallow                                                                                                                                        | Glottal release                                                                   | Post swallow respirations                                                                                                                                                                                                                                                              |
|-----------------|----------------------------------------------------------------------------------------------------------------------------------------------------------------------------------------|------------------------------------------------------------------------------------------------------------------------------------------------|-----------------------------------------------------------------------------------|----------------------------------------------------------------------------------------------------------------------------------------------------------------------------------------------------------------------------------------------------------------------------------------|
| Normal          | <ul style="list-style-type: none"> <li>• Tidal respirations (even breathing)</li> </ul>                                                                                                | <ul style="list-style-type: none"> <li>• Crisp, distinct, clear</li> <li>• Quick, coordinated.</li> </ul>                                      | <ul style="list-style-type: none"> <li>• Present</li> </ul>                       | <ul style="list-style-type: none"> <li>• Expiration post swallow</li> <li>• Return to even breathing (as per pre-swallow)</li> </ul>                                                                                                                                                   |
| Abnormal        | <ul style="list-style-type: none"> <li>• Breathing throughout oral phase (liquids)</li> <li>• Audible tongue pumping</li> <li>• Quality of sounds (wet, audible secretions)</li> </ul> | <ul style="list-style-type: none"> <li>• Dissociated</li> <li>• Dull</li> <li>• Constricted</li> <li>• Drawn-out</li> <li>• Choking</li> </ul> | <ul style="list-style-type: none"> <li>• Long apnoea</li> <li>• Absent</li> </ul> | <ul style="list-style-type: none"> <li>• Inspiration post swallow</li> <li>• Increased respiratory rate</li> <li>• Gurgling/bubbling</li> <li>• Crackles, wet, audible secretions (liquid vibrating sounds)</li> <li>• Stridor, wheeze</li> <li>• Coughing, throat-clearing</li> </ul> |

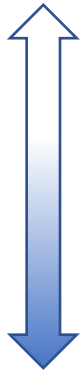

Summarised from previous research:

Bergström et al., *Int. J. Speech. Lang. Pathol.* 2014;16(5):517-28. doi: 10.3109/17549507.2013.855259.

Bergström & Cichero. *Int. J. Speech. Lang. Pathol.* 2021, doi: 10.1080/17549507.2021.1953592.

Frakking et al. *Dysphagia.* 2016;31:738-748. doi: 10.1007/s00455-016-9727-5.

Cichero & Murdoch (Ed). *Dysphagia: foundation, theory and practice.* John Wiley & Sons; 2006. pp 178.

Yamashita et al. *J. Oral Rehabil.* 2014;41:667-674. doi: 10.1111/joor.12184.
